# Supplementary material for: Stable lithium–sulfur full cells enabled by dual functional and interconnected mesocarbon arrays
Source: Royal Society of Chemistry journal article supplement (doi:10.1039/c8ta10351h), 2019-01-01
Supplement: c8ta10351h1.pdf [file c8ta10351h1.pdf]

## Supplementary Information

### Stable lithium-sulfur full cell enabled by dual functional and interconnected mesocarbon array

Daxian Cao,<sup>1</sup> Yucong Jiao,<sup>1</sup> Qingfu Cai,<sup>2</sup> Dandan Han,<sup>2</sup> Qing Zhang,<sup>1</sup> Yi Ma,<sup>1</sup> Angang Dong,<sup>2</sup> Hongli Zhu<sup>1\*</sup>

<sup>1</sup>Department of Mechanical and Industrial Engineering, Northeastern University, Boston, Massachusetts 02115, United States

<sup>2</sup>Department of Chemistry and Collaborative Innovation Center of Chemistry for Energy Materials, Fudan University, Shanghai 200433, China

\*: Corresponding author: Hongli Zhu. E-mail: [h.zhu@neu.edu](mailto:h.zhu@neu.edu)

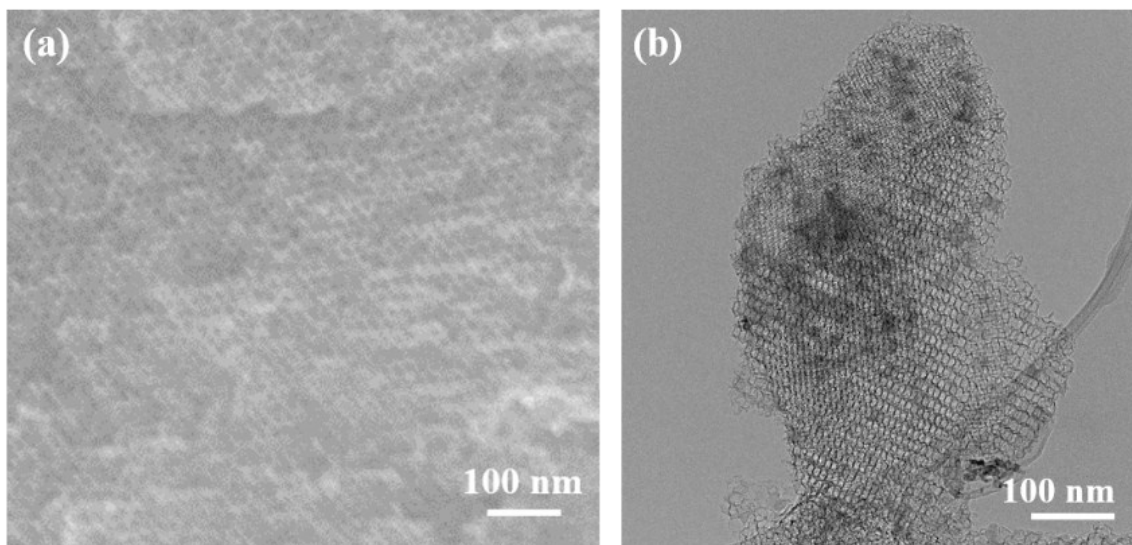

**Figure S1.** (a) SEM and (b) TEM images of MPC-1300 with sulfur melt inside, showing long-range ordered mesoporous property.

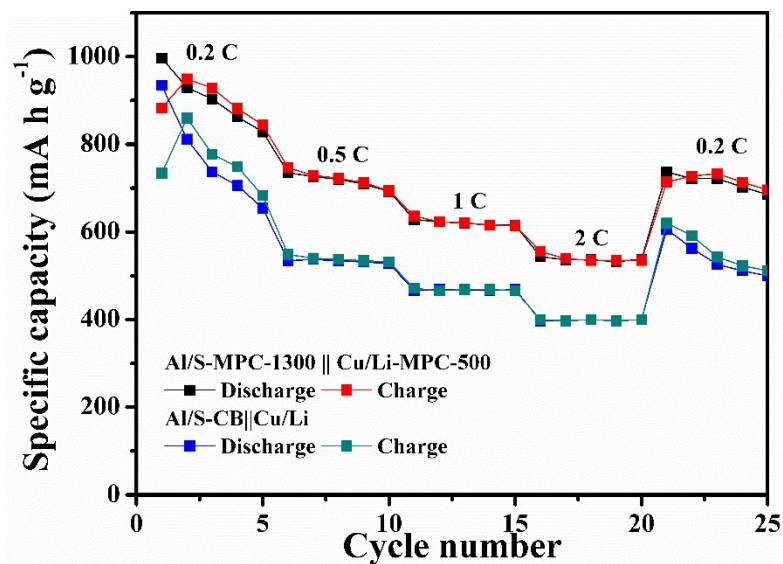

Figure S2. The rate performance of Al/S-MPC-1300 || Cu/Li-MPC-500 cell and Al/S-CB || Cu/Li cell.

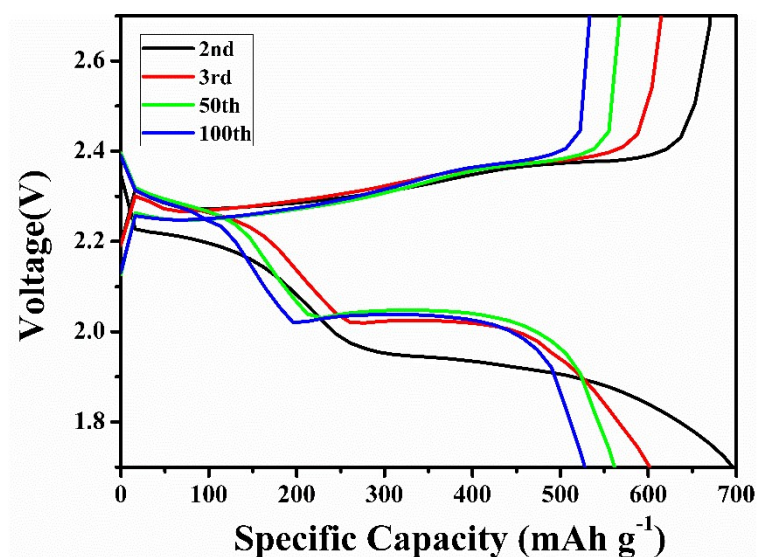

Figure S3. The charge/discharge profiles of Al/S-MPC-1300 || Cu/Li-MPC-500 cell.

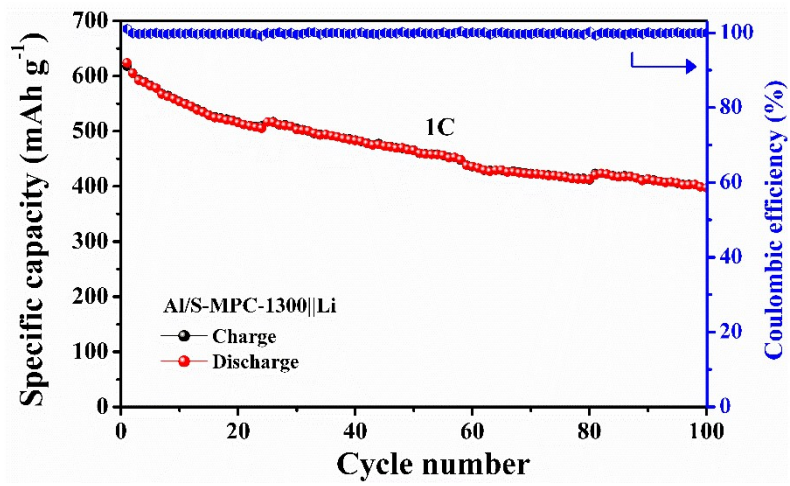

Figure S4. The cycling performance of Al/S-MPC-1300 || Li foil cell.
